# Supplementary material for: Population-Based External Validation of the EASIX Scores to Predict CAR T-Cell-Related Toxicities
Source: MDPI journal article supplement (doi:10.3390/cancers15225443), 2023-11-16
Supplement: s1 [file s1]

**Table S1.** Summary statistics of EASIX, m-EASIX and s-EASIX scores at baseline, pre-LD and infusion grouped for grade < 2 and grade ≥ 2.

|          |         |              | CRS              |                   | ICANS            |                   | Overall           |
|----------|---------|--------------|------------------|-------------------|------------------|-------------------|-------------------|
|          |         |              | Grade < 2        | Grade ≥ 2         | Grade < 2        | Grade ≥ 2         |                   |
| Baseline | EASIX   | Median (IQR) | 1.30 (0.80–2.37) | 1.59 (0.89–2.73)  | 1.19 (0.78–2.34) | 1.61 (0.92–2.74)  | 1.31 (0.81–2.60)  |
|          |         | Range        | (0.29–145.40)    | (0.36–42.00)      | (0.36–42.00)     | (0.29–145.40)     | (0.29–145.40)     |
|          |         | N            | 76               | 61                | 82               | 55                | 137               |
|          | m-EASIX | Median (IQR) | 2.32 (0.68–5.75) | 4.33 (0.83–9.76)  | 3.22 (0.86–8.06) | 2.08 (0.54–9.56)  | 2.61 (0.68–8.79)  |
|          |         | Range        | (0.02–76.51)     | (0.04–106.63)     | (0.02–41.25)     | (0.06–106.63)     | (0.02–106.63)     |
|          |         | N            | 56               | 44                | 56               | 44                | 100               |
|          | s-EASIX | Median (IQR) | 1.35 (0.99–2.44) | 1.42 (1.09–2.90)  | 1.34 (0.95–2.44) | 1.63 (1.08–3.23)  | 1.39 (1.01–2.62)  |
|          |         | Range        | (0.36–98.11)     | (0.58–45.83)      | (0.47–45.83)     | (0.36–98.11)      | (0.36–98.11)      |
|          |         | N            | 77               | 61                | 82               | 56                | 138               |
| Pre-LD   | EASIX   | Median (IQR) | 1.13 (0.79–2.18) | 1.45 (0.82–2.51)  | 1.06 (0.77–1.68) | 1.72 (0.98–3.01)  | 1.29 (0.82–2.27)  |
|          |         | Range        | (0.32–23.37)     | (0.28–62.75)      | (0.28–62.75)     | (0.32–27.35)      | (0.28–62.75)      |
|          |         | N            | 84               | 68                | 89               | 63                | 152               |
|          | m-EASIX | Median (IQR) | 0.92 (0.30–3.28) | 1.67 (0.44–13.25) | 0.93 (0.27–4.22) | 2.37 (0.54–10.61) | 1.27 (0.35–6.46)  |
|          |         | Range        | (0.03–211.72)    | (0.04–383.22)     | (0.03–383.22)    | (0.05–211.72)     | (0.03–383.22)     |
|          |         | N            | 83               | 58                | 82               | 59                | 141               |
|          | s-EASIX | Median (IQR) | 1.36 (0.92–2.19) | 1.52 (0.94–3.36)  | 1.27 (0.91–1.78) | 1.81 (1.03–3.71)  | 1.40 (0.92–2.61)  |
|          |         | Range        | (0.34–17.07)     | (0.33–69.33)      | (0.33–69.33)     | (0.34–26.87)      | (0.33–69.33)      |
|          |         | N            | 84               | 68                | 89               | 63                | 152               |
| Infusion | EASIX   | Median (IQR) | 1.39 (0.89–2.12) | 1.82 (0.95–4.40)  | 1.32 (0.84–2.20) | 1.83 (0.97–4.56)  | 1.44 (0.93–3.08)  |
|          |         | Range        | (0.04–16.58)     | (0.17–36.44)      | (0.04–36.44)     | (0.39–23.02)      | (0.04–36.44)      |
|          |         | N            | 71               | 52                | 72               | 51                | 123               |
|          | m-EASIX | Median (IQR) | 3.40 (0.76–8.39) | 6.73 (2.24–23.53) | 3.56 (0.75–8.41) | 6.73 (2.21–22.90) | 4.64 (1.07–12.97) |
|          |         | Range        | (0.08–247.18)    | (0.04–351.06)     | (0.08–351.06)    | (0.04–247.18)     | (0.04–351.06)     |
|          |         | N            | 66               | 49                | 69               | 46                | 115               |
|          | s-EASIX | Median (IQR) | 1.78 (1.23–2.67) | 2.24 (1.35–4.99)  | 1.66 (1.22–3.08) | 2.23 (1.44–5.01)  | 1.95 (1.26–3.52)  |
|          |         | Range        | (0.49–27.15)     | (0.27–50.33)      | (0.27–50.33)     | (0.49–29.07)      | (0.27–50.33)      |
|          |         | N            | 71               | 52                | 72               | 51                | 123               |

CRS = cytokine release syndrome; ICANS = immune effector cell-associated neurotoxicity syndrome; IQR= interquartile range; EASIX = Endothelial Activation and Stress Index; m-EASIX = modified EASIX score; s-EASIX = simplified EASIX score; pre-LD = pre-lymphodepleting chemotherapy (day-15 until day -5).

**Table S2.** Summary statistics of EASIX, m-EASIX and s-EASIX scores at baseline, pre-LD and infusion grouped for grade < 3 and grade ≥ 3.

|          |         |              | CRS               |                   | ICANS             |                   | CRS or ICANS      |                   |
|----------|---------|--------------|-------------------|-------------------|-------------------|-------------------|-------------------|-------------------|
|          |         |              | Grade < 3         | Grade ≥ 3         | Grade < 3         | Grade ≥ 3         | Grade < 3         | Grade ≥ 3         |
| Baseline | EASIX   | Median (IQR) | 1.30 (0.81–2.55)  | 2.68 (1.24–2.72)  | 1.25 (0.80–2.53)  | 1.64 (1.12–2.68)  | 1.23 (0.81–2.47)  | 1.68 (1.00–2.70)  |
|          |         | Range        | (0.29–145.40)     | (0.70–3.78)       | (0.29–145.40)     | (0.46–18.74)      | (0.29–145.40)     | (0.46–18.74)      |
|          |         | N            | 130               | 7                 | 108               | 29                | 103               | 34                |
|          | m-EASIX | Median (IQR) | 2.79 (0.70–8.80)  | 1.24 (0.47–4.94)  | 2.97 (0.70–8.80)  | 1.85 (0.55–7.32)  | 2.99 (0.89–8.81)  | 1.76 (0.52–7.26)  |
|          |         | Range        | (0.02–106.63)     | (0.07–26.13)      | (0.02–76.51)      | (0.06–106.63)     | (0.02–76.51)      | (0.06–106.63)     |
|          |         | N            | 94                | 6                 | 78                | 22                | 73                | 27                |
|          | s-EASIX | Median (IQR) | 1.37 (0.97–2.60)  | 2.52 (1.32–3.33)  | 1.36 (0.93–2.59)  | 1.63 (1.11–3.01)  | 1.35 (0.89–2.59)  | 1.55 (1.16–3.01)  |
|          |         | Range        | (0.36–98.11)      | (1.18–4.51)       | (0.36–98.11)      | (0.61–15.20)      | (0.36–98.11)      | (0.61–15.20)      |
|          |         | N            | 131               | 7                 | 108               | 30                | 103               | 35                |
| Pre-LD   | EASIX   | Median (IQR) | 1.29 (0.82–2.26)  | 1.30 (0.82–3.58)  | 1.13 (0.79–2.21)  | 1.46 (1.00–2.65)  | 1.13 (0.80–2.22)  | 1.45 (0.87–2.61)  |
|          |         | Range        | (0.28–62.75)      | (0.56–5.62)       | (0.28–62.75)      | (0.32–23.37)      | (0.28–62.75)      | (0.32–23.37)      |
|          |         | N            | 144               | 8                 | 120               | 32                | 114               | 38                |
|          | m-EASIX | Median (IQR) | 1.28 (0.35–6.55)  | 0.91 (0.60–1.63)  | 1.14 (0.33–6.24)  | 2.16 (0.54–6.72)  | 1.22 (0.34–6.55)  | 1.58 (0.54–5.72)  |
|          |         | Range        | (0.03–383.22)     | (0.08–61.53)      | (0.03–383.22)     | (0.05–211.72)     | (0.03–383.22)     | (0.05–211.72)     |
|          |         | N            | 134               | 7                 | 111               | 30                | 106               | 35                |
|          | s-EASIX | Median (IQR) | 1.40 (0.92–2.59)  | 1.35 (0.93–4.25)  | 1.37 (0.92–2.35)  | 1.77 (1.02–2.76)  | 1.38 (0.92–2.49)  | 1.64 (0.96–2.69)  |
|          |         | Range        | (0.33–69.33)      | (0.85–5.70)       | (0.33–69.33)      | (0.51–17.07)      | (0.33–69.33)      | (0.51–17.07)      |
|          |         | N            | 144               | 8                 | 120               | 32                | 114               | 38                |
| Infusion | EASIX   | Median (IQR) | 1.43 (0.93–2.81)  | 2.56 (1.12–6.15)  | 1.38 (0.83–2.46)  | 2.11 (0.99–4.35)  | 1.39 (0.84–2.37)  | 2.10 (0.99–4.29)  |
|          |         | Range        | (0.04–36.44)      | (0.66–23.02)      | (0.04–36.44)      | (0.39–23.02)      | (0.04–36.44)      | (0.39–23.02)      |
|          |         | N            | 118               | 5                 | 98                | 25                | 95                | 28                |
|          | m-EASIX | Median (IQR) | 4.64 (0.96–12.97) | 7.99 (3.27–69.38) | 4.45 (0.77–12.00) | 5.84 (1.67–26.61) | 4.55 (0.76–12.27) | 5.45 (1.47–20.40) |
|          |         | Range        | (0.04–351.06)     | (1.13–241.54)     | (0.04–351.06)     | (0.06–241.54)     | (0.04–351.06)     | (0.06–241.54)     |
|          |         | N            | 111               | 4                 | 93                | 22                | 90                | 25                |
|          | s-EASIX | Median (IQR) | 1.94 (1.26–3.32)  | 2.26 (1.36–10.08) | 1.81 (1.22–3.12)  | 2.49 (1.56–4.97)  | 1.81 (1.22–3.18)  | 2.30 (1.51–4.82)  |
|          |         | Range        | (0.27–50.33)      | (1.02–29.07)      | (0.27–50.33)      | (0.72–29.07)      | (0.27–50.33)      | (0.72–29.07)      |
|          |         | N            | 118               | 5                 | 98                | 25                | 95                | 28                |

CRS = cytokine release syndrome; ICANS = immune effector cell-associated neurotoxicity syndrome; IQR= interquartile range; EASIX = Endothelial Activation and Stress Index; m-EASIX = modified EASIX score; s-EASIX = simplified EASIX score; pre-LD = pre-lymphodepleting chemotherapy (day-15 until day -5).

**Table S3.** Analysis of the association between the EASIX score and its derivatives and CRS and ICANS

|          |          | CRS grade $\geq 2$ |             |          | ICANS grade $\geq 2$ |             |             | CRS grade $\geq 3$ |             |          | ICANS grade $\geq 3$ |             |          | CRS/ICANS grade $\geq 3$ |             |          |
|----------|----------|--------------------|-------------|----------|----------------------|-------------|-------------|--------------------|-------------|----------|----------------------|-------------|----------|--------------------------|-------------|----------|
|          |          | OR                 | 95% CI      | <i>p</i> | OR                   | 95% CI      | <i>p</i>    | OR                 | 95% CI      | <i>p</i> | OR                   | 95% CI      | <i>p</i> | OR                       | 95% CI      | <i>p</i> |
| EASIX*   | Baseline | 1.08               | 0.85 - 1.37 | 0.52     | 1.20                 | 0.94 - 1.54 | 0.15        | 1.13               | 0.68 - 1.87 | 0.64     | 1.02                 | 0.77 - 1.37 | 0.87     | 1.02                     | 0.78 - 1.34 | 0.89     |
|          | Pre-LD   | 1.19               | 0.93 - 1.52 | 0.17     | 1.31                 | 1.02 - 1.68 | <b>0.04</b> | 1.07               | 0.64 - 1.79 | 0.81     | 1.12                 | 0.84 - 1.48 | 0.45     | 1.05                     | 0.80 - 1.38 | 0.71     |
|          | Infusion | 1.17               | 0.93 - 1.47 | 0.18     | 1.28                 | 1.00 - 1.62 | <b>0.05</b> | 1.32               | 0.83 - 2.10 | 0.23     | 1.23                 | 0.93 - 1.61 | 0.14     | 1.18                     | 0.92 - 1.53 | 0.20     |
| m-EASIX* | Baseline | 1.04               | 0.91 - 1.19 | 0.59     | 1.03                 | 0.90 - 1.18 | 0.64        | 0.91               | 0.68 - 1.23 | 0.54     | 0.93                 | 0.78 - 1.11 | 0.44     | 0.92                     | 0.78 - 1.08 | 0.29     |
|          | Pre-LD   | 1.11               | 0.99 - 1.24 | 0.08     | 1.11                 | 0.99 - 1.25 | 0.06        | 0.96               | 0.75 - 1.23 | 0.75     | 1.04                 | 0.91 - 1.18 | 0.59     | 1.00                     | 0.88 - 1.13 | 0.99     |
|          | Infusion | 1.10               | 0.97 - 1.24 | 0.14     | 1.10                 | 0.97 - 1.25 | 0.13        | 1.16               | 0.85 - 1.58 | 0.35     | 1.05                 | 0.90 - 1.22 | 0.53     | 1.04                     | 0.90 - 1.20 | 0.62     |
| s-EASIX* | Baseline | 1.13               | 0.87 - 1.48 | 0.35     | 1.29                 | 0.98 - 1.70 | 0.07        | 1.22               | 0.73 - 2.02 | 0.45     | 0.99                 | 0.72 - 1.37 | 0.96     | 1.00                     | 0.74 - 1.35 | 0.99     |
|          | Pre-LD   | 1.22               | 0.94 - 1.57 | 0.14     | 1.33                 | 1.02 - 1.73 | <b>0.04</b> | 1.08               | 0.63 - 1.85 | 0.77     | 1.09                 | 0.81 - 1.47 | 0.58     | 1.02                     | 0.77 - 1.37 | 0.87     |
|          | Infusion | 1.20               | 0.93 - 1.54 | 0.16     | 1.28                 | 0.99 - 1.67 | 0.06        | 1.34               | 0.82 - 2.18 | 0.24     | 1.22                 | 0.91 - 1.64 | 0.19     | 1.16                     | 0.87 - 1.54 | 0.30     |

\* Log2 transformed. EASIX = Endothelial Activation and Stress Index; m-EASIX = modified EASIX score; s-EASIX = simplified EASIX score; CI = confidence interval; CRS = cytokine release syndrome; ICANS = immune effector cell-associated neurotoxicity syndrome; LDH = lactate dehydrogenase; pre-LD = pre-lymphodepleting chemotherapy (day-15 until day -5); OR = odds ratio; *p* = *p*-value; ULN = upper limit of normal. Bold indicates statistically significant values.

**Table S4.** Analysis of the association of laboratory parameters and CRS and ICANS.

|             |          | CRS grade $\geq 2$ |             |             | ICANS grade $\geq 2$ |             |             | CRS grade $\geq 3$ |              |          | ICANS grade $\geq 3$ |             |          | CRS/ICANS grade $\geq 3$ |             |          |
|-------------|----------|--------------------|-------------|-------------|----------------------|-------------|-------------|--------------------|--------------|----------|----------------------|-------------|----------|--------------------------|-------------|----------|
|             |          | OR                 | 95% CI      | <i>p</i>    | OR                   | 95% CI      | <i>p</i>    | OR                 | 95% CI       | <i>p</i> | OR                   | 95% CI      | <i>p</i> | OR                       | 95% CI      | <i>p</i> |
| Platelets*  | Baseline | 1.04               | 0.74 - 1.44 | 0.83        | 0.63                 | 0.44 - 0.91 | <b>0.02</b> | 1.28               | 0.54 - 3.03  | 0.57     | 0.85                 | 0.58 - 1.24 | 0.40     | 0.93                     | 0.64 - 1.34 | 0.68     |
|             | Pre-LD   | 0.99               | 0.73 - 1.36 | 0.97        | 0.74                 | 0.52 - 1.03 | 0.08        | 1.22               | 0.54 - 2.80  | 0.63     | 0.91                 | 0.63 - 1.31 | 0.60     | 0.95                     | 0.67 - 1.36 | 0.80     |
|             | Infusion | 0.96               | 0.71 - 1.30 | 0.79        | 0.73                 | 0.53 - 1.00 | <b>0.05</b> | 0.84               | 0.45 - 1.57  | 0.58     | 0.82                 | 0.57 - 1.16 | 0.26     | 0.82                     | 0.58 - 1.15 | 0.24     |
| Creatinine* | Baseline | 0.80               | 0.39 - 1.62 | 0.53        | 0.79                 | 0.38 - 1.63 | 0.52        | 0.58               | 0.09 - 3.66  | 0.55     | 1.30                 | 0.56 - 3.02 | 0.54     | 1.17                     | 0.52 - 2.63 | 0.70     |
|             | Pre-LD   | 0.94               | 0.41 - 2.12 | 0.87        | 1.11                 | 0.49 - 2.54 | 0.80        | 0.90               | 0.14 - 5.69  | 0.91     | 1.49                 | 0.55 - 4.01 | 0.43     | 1.41                     | 0.55 - 3.59 | 0.47     |
|             | Infusion | 1.09               | 0.59 - 2.01 | 0.79        | 1.36                 | 0.68 - 2.70 | 0.38        | 1.35               | 0.27 - 6.70  | 0.71     | 1.42                 | 0.58 - 3.45 | 0.44     | 1.56                     | 0.66 - 3.68 | 0.31     |
| CRP*        | Baseline | 1.02               | 0.86 - 1.20 | 0.84        | 0.98                 | 0.83 - 1.15 | 0.78        | 0.84               | 0.58 - 1.20  | 0.32     | 0.91                 | 0.74 - 1.13 | 0.40     | 0.89                     | 0.73 - 1.08 | 0.23     |
|             | Pre-LD   | 1.11               | 0.96 - 1.27 | 0.16        | 1.09                 | 0.95 - 1.25 | 0.24        | 0.92               | 0.68 - 1.25  | 0.59     | 1.03                 | 0.88 - 1.21 | 0.71     | 1.00                     | 0.85 - 1.16 | 0.95     |
|             | Infusion | 1.09               | 0.93 - 1.28 | 0.29        | 1.07                 | 0.91 - 1.26 | 0.42        | 1.13               | 0.72 - 1.80  | 0.58     | 1.00                 | 0.82 - 1.21 | 0.99     | 1.00                     | 0.83 - 1.21 | 0.98     |
| LDH*        | Baseline | 1.44               | 0.94 - 2.20 | 0.09        | 0.95                 | 0.62 - 1.45 | 0.80        | 1.99               | 0.91 - 4.34  | 0.08     | 0.73                 | 0.42 - 1.29 | 0.28     | 0.89                     | 0.54 - 1.44 | 0.62     |
|             | Pre-LD   | 2.00               | 1.19 - 3.35 | <b>0.01</b> | 1.36                 | 0.85 - 2.18 | 0.20        | 1.70               | 0.73 - 3.99  | 0.22     | 1.08                 | 0.61 - 1.89 | 0.80     | 0.98                     | 0.57 - 1.68 | 0.94     |
|             | Infusion | 1.63               | 1.00 - 2.64 | <b>0.05</b> | 1.14                 | 0.72 - 1.81 | 0.57        | 1.69               | 0.75 - 3.82  | 0.20     | 1.22                 | 0.71 - 2.09 | 0.47     | 1.04                     | 0.62 - 1.76 | 0.87     |
| LDH > ULN   | Baseline | 1.61               | 0.80 - 3.27 | 0.18        | 0.64                 | 0.33 - 1.26 | 0.20        | 4.01               | 0.45 - 35.32 | 0.21     | 0.51                 | 0.23 - 1.13 | 0.10     | 0.64                     | 0.30 - 1.37 | 0.25     |
|             | Pre-LD   | 1.58               | 0.83 - 3.02 | 0.17        | 1.49                 | 0.78 - 2.87 | 0.23        | 1.16               | 0.28 - 4.87  | 0.84     | 0.87                 | 0.39 - 1.92 | 0.73     | 0.79                     | 0.37 - 1.67 | 0.53     |
|             | Infusion | 2.10               | 1.05 - 4.20 | <b>0.04</b> | 1.52                 | 0.72 - 3.22 | 0.27        | 1.13               | 0.21 - 5.99  | 0.89     | 1.67                 | 0.69 - 4.05 | 0.25     | 1.34                     | 0.58 - 3.09 | 0.48     |
| Ferritin*   | Baseline | 1.08               | 0.82 - 1.44 | 0.56        | 1.02                 | 0.80 - 1.30 | 0.86        | 1.04               | 0.57 - 1.90  | 0.89     | 1.08                 | 0.78 - 1.49 | 0.64     | 1.09                     | 0.80 - 1.50 | 0.57     |
|             | Pre-LD   | 1.02               | 0.83 - 1.26 | 0.84        | 1.11                 | 0.89 - 1.39 | 0.35        | 1.09               | 0.66 - 1.79  | 0.73     | 1.06                 | 0.81 - 1.38 | 0.67     | 1.04                     | 0.80 - 1.35 | 0.76     |
|             | Infusion | 1.16               | 0.90 - 1.50 | 0.25        | 1.29                 | 1.00 - 1.67 | <b>0.05</b> | 1.50               | 0.78 - 2.88  | 0.22     | 1.09                 | 0.79 - 1.50 | 0.61     | 1.12                     | 0.82 - 1.52 | 0.46     |

\* Log2 transformed. CRP = C-reactive protein; CRS = cytokine release syndrome; CI = confidence interval; ICANS = immune effector cell-associated neurotoxicity syndrome; LDH = lactate dehydrogenase; OR = odds ratio; *p* = *p*-value; pre-LD = pre-lymphodepleting chemotherapy (day-15 until day -5); ULN = upper limit of normal. Bold indicates statistically significant values.

**Table S5.** Analysis of the association between patients' characteristics and CRS and ICANS

|                                           | CRS grade $\geq 2$ |             |          | ICANS grade $\geq 2$ |             |             | CRS grade $\geq 3$ |              |             | ICANS grade $\geq 3$ |             |             | CRS/ICANS grade $\geq 3$ |              |             |
|-------------------------------------------|--------------------|-------------|----------|----------------------|-------------|-------------|--------------------|--------------|-------------|----------------------|-------------|-------------|--------------------------|--------------|-------------|
|                                           | OR                 | 95% CI      | <i>p</i> | OR                   | 95% CI      | <i>p</i>    | OR                 | 95% CI       | <i>p</i>    | OR                   | 95% CI      | <i>p</i>    | OR                       | 95% CI       | <i>p</i>    |
| Age<br>( $> 65$ vs $\leq 65$ )            | 0.91               | 0.45 - 1.85 | 0.80     | 1.54                 | 0.35 - 6.72 | 0.57        | 1.68               | 0.83 - 3.41  | 0.15        | 1.41                 | 0.61 - 3.25 | 0.42        | 1.67                     | 0.77 - 3.65  | 0.20        |
| Gender<br>(male vs female)                | 0.77               | 0.39 - 1.50 | 0.44     | 0.51                 | 0.12 - 2.11 | 0.35        | 0.42               | 0.21 - 0.83  | <b>0.01</b> | 0.44                 | 0.20 - 0.96 | <b>0.04</b> | 0.41                     | 0.20 - 0.88  | <b>0.02</b> |
| Diagnosis<br>(DLBCL vs rest)              | 1.38               | 0.73 - 2.62 | 0.32     | 1.25                 | 0.65 - 2.40 | 0.49        | NA                 | NA           | -           | 0.70                 | 0.32 - 1.55 | 0.38        | 1.11                     | 0.53 - 2.33  | 0.78        |
| ECOG<br>( $> 0$ vs $0$ )                  | 1.60               | 0.81 - 3.15 | 0.17     | 1.55                 | 0.77 - 3.11 | 0.22        | 5.28               | 0.96 - 29.07 | 0.06        | 1.01                 | 0.44 - 2.30 | 0.99        | 1.29                     | 0.60 - 2.79  | 0.52        |
| ECOG<br>( $> 1$ vs $\leq 1$ )             | 1.10               | 0.31 - 3.83 | 0.88     | 1.90                 | 0.54 - 6.65 | 0.31        | 6.66               | 1.08 - 41.05 | <b>0.04</b> | 2.12                 | 0.58 - 7.76 | 0.25        | 2.99                     | 0.84 - 10.66 | 0.09        |
| Stage<br>(III - IV vs I - II)             | 0.56               | 0.26 - 1.22 | 0.14     | 0.45                 | 0.10 - 1.98 | 0.29        | 0.84               | 0.39 - 1.82  | 0.67        | 0.81                 | 0.33 - 2.02 | 0.65        | 0.61                     | 0.26 - 1.40  | 0.24        |
| Bulky disease<br>(yes vs no)              | 1.53               | 0.78 - 3.01 | 0.22     | 0.91                 | 0.46 - 1.82 | 0.79        | 1.15               | 0.26 - 5.05  | 0.86        | 1.39                 | 0.62 - 3.13 | 0.42        | 1.33                     | 0.62 - 2.86  | 0.46        |
| Extranodal sites<br>(yes vs no)           | 1.11               | 0.56 - 2.19 | 0.77     | 0.91                 | 0.46 - 1.81 | 0.79        | 0.86               | 0.20 - 3.81  | 0.84        | 1.43                 | 0.60 - 3.39 | 0.41        | 1.18                     | 0.53 - 2.59  | 0.69        |
| Extranodal sites<br>( $\geq 2$ vs $< 2$ ) | 1.03               | 0.51 - 2.09 | 0.94     | 0.63                 | 0.30 - 1.31 | 0.22        | 0.78               | 0.15 - 4.08  | 0.77        | 1.10                 | 0.47 - 2.58 | 0.83        | 0.95                     | 0.42 - 2.16  | 0.91        |
| IPI score<br>( $> 1$ vs $\leq 1$ )        | 0.90               | 0.35 - 2.33 | 0.83     | 3.15                 | 1.03 - 9.67 | <b>0.05</b> | 1.22               | 0.13 - 11.83 | 0.86        | 1.64                 | 0.47 - 5.70 | 0.43        | 1.42                     | 0.45 - 4.46  | 0.55        |
| IPI score<br>( $> 2$ vs $\leq 2$ )        | 1.58               | 0.64 - 3.94 | 0.32     | 1.87                 | 0.73 - 4.74 | 0.19        | 4.44               | 0.68 - 28.98 | 0.12        | 0.81                 | 0.26 - 2.51 | 0.71        | 1.13                     | 0.40 - 3.18  | 0.81        |

CI = confidence interval; CRS = cytokine release syndrome; DLBCL = Diffuse large B cell lymphoma; ECOG = eastern cooperative oncology group; ICANS = immune effector cell-associated neurotoxicity syndrome; IPI = international prognostic index; OR = odds ratio; *p* = *p*-value; Bold indicates statistically significant values.

**Table S6.** Univariable analyses of pre-LD (m-)EASIX using the different cut-offs proposed by the included studies

|                    | CRS grade $\geq 2$ |             |          |      | ICANS grade $\geq 2$ |             |                               |      | ICANS grade $\geq 3$ |             |          |      | CRS/ICANS grade $\geq 3$ |             |          |      |
|--------------------|--------------------|-------------|----------|------|----------------------|-------------|-------------------------------|------|----------------------|-------------|----------|------|--------------------------|-------------|----------|------|
|                    | OR                 | 95% CI      | <i>p</i> | AUC  | OR                   | 95% CI      | <i>p</i>                      | AUC  | OR                   | 95% CI      | <i>p</i> | AUC  | OR                       | 95% CI      | <i>p</i> | AUC  |
| EASIX $> 4.67^a$   | -                  | -           | -        | -    | -                    | -           | -                             | -    | -                    | -           | -        | -    | 0.61                     | 0.16 - 2.27 | 0.46     | 0.52 |
| EASIX $> 2.1^a$    | -                  | -           | -        | -    | 3.24                 | 1.58 - 6.68 | <b><math>&lt; 0.01</math></b> | 0.62 | -                    | -           | -        | -    | -                        | -           | -        | -    |
| EASIX $> 4.6^b$    | 1.81               | 0.64 - 5.07 | 0.26     | 0.53 | -                    | -           | -                             | -    | -                    | -           | -        | -    | -                        | -           | -        | -    |
| m-EASIX $\geq 4^c$ | -                  | -           | -        | -    | -                    | -           | -                             | -    | 1.28                 | 0.55 - 2.99 | 0.56     | 0.53 | -                        | -           | -        | -    |

<sup>a</sup>Proposed by Greenbaum et al. [8]; <sup>b</sup>Proposed by Korell et al. [17]; <sup>c</sup>Proposed by Acosta-Medina et al. [18]; AUC = area under the curve; CI = confidence interval; CRP = C-reactive protein; CRS = cytokine release syndrome; DLBCL = Diffuse large B cell lymphoma; EASIX = Endothelial Activation and Stress Index; m-EASIX = modified EASIX score; s-EASIX = simplified EASIX score; ICANS = immune effector cell-associated neurotoxicity syndrome; IPI = International Prognostic Index; IQR = interquartile range; LDH = lactate dehydrogenase; OR = odds ratio; *p* = *p*-value; pre-LD = pre-lymphodepleting chemotherapy (day-15 until day -5); ULN = upper limit of normal. Bold indicates statistically significant values.
